# Supplementary material for: Stability and function of adult vasculature is sustained by Akt/Jagged1 signalling axis in endothelium
Source: Nat Commun. 2016 Mar 14;7:10960. doi: 10.1038/ncomms10960 (PMC4793084; doi:10.1038/ncomms10960)
Supplement: Supplementary Information — Supplementary Figures 1-16 and Supplementary Tables 1-2 [file ncomms10960-s1.pdf]

## Supplementary Figure 1

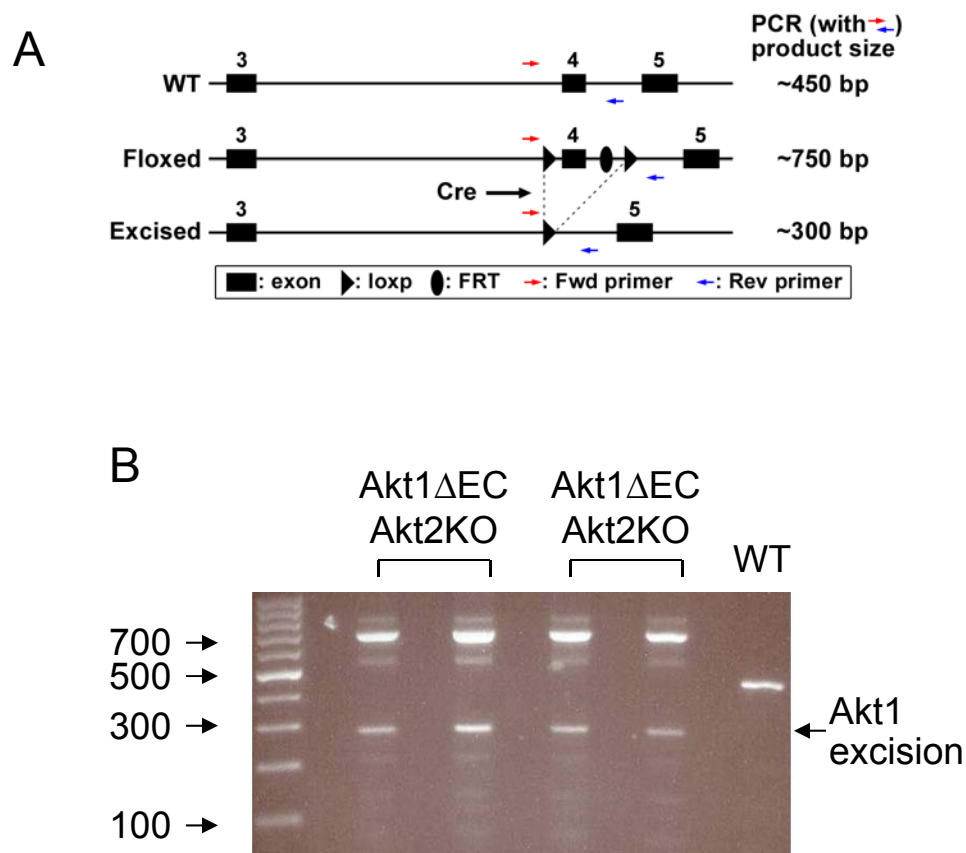

**Supplementary Figure 1. Akt1 excision in genomic tail DNA.** (A) Experimental design for PCR amplification of mouse tail genomic DNA from Akt1 $\Delta$ EC; Akt2KO, and WT mice. The forward (in red) and reverse (in blue) PCR primers are flanking the exon 4 region of Akt1 genomic DNA and their sequences are TCACAGAGATCCACCTGTGC and GGGCCTCCATACACTCAAGA, respectively. The ~450 bp band corresponds to the WT allele without loxp insertion, ~750 bp band to the floxed Akt1 allele before Cre-mediated excision (in all tissues of Akt1 $\Delta$ EC; Akt2KO mice), and ~300 bp band to the excised allele (from endothelial cells of Akt1 $\Delta$ EC; Akt2KO mice). (B) Results of PCR amplification of mouse tail genomic DNA from Akt1 $\Delta$ EC;Akt2KO (representative samples from 2 mice in duplicate) and WT mice after 5 days of i.p. injections of 4 $\mu$ L/g body weight tamoxifen (20mg/mL) followed by tamoxifen diet for 3 weeks (4 weeks of tamoxifen treatment). The 450 bp band corresponds to the WT allele and the ~300bp band to the excised Akt1 allele.

## Supplementary Figure 2

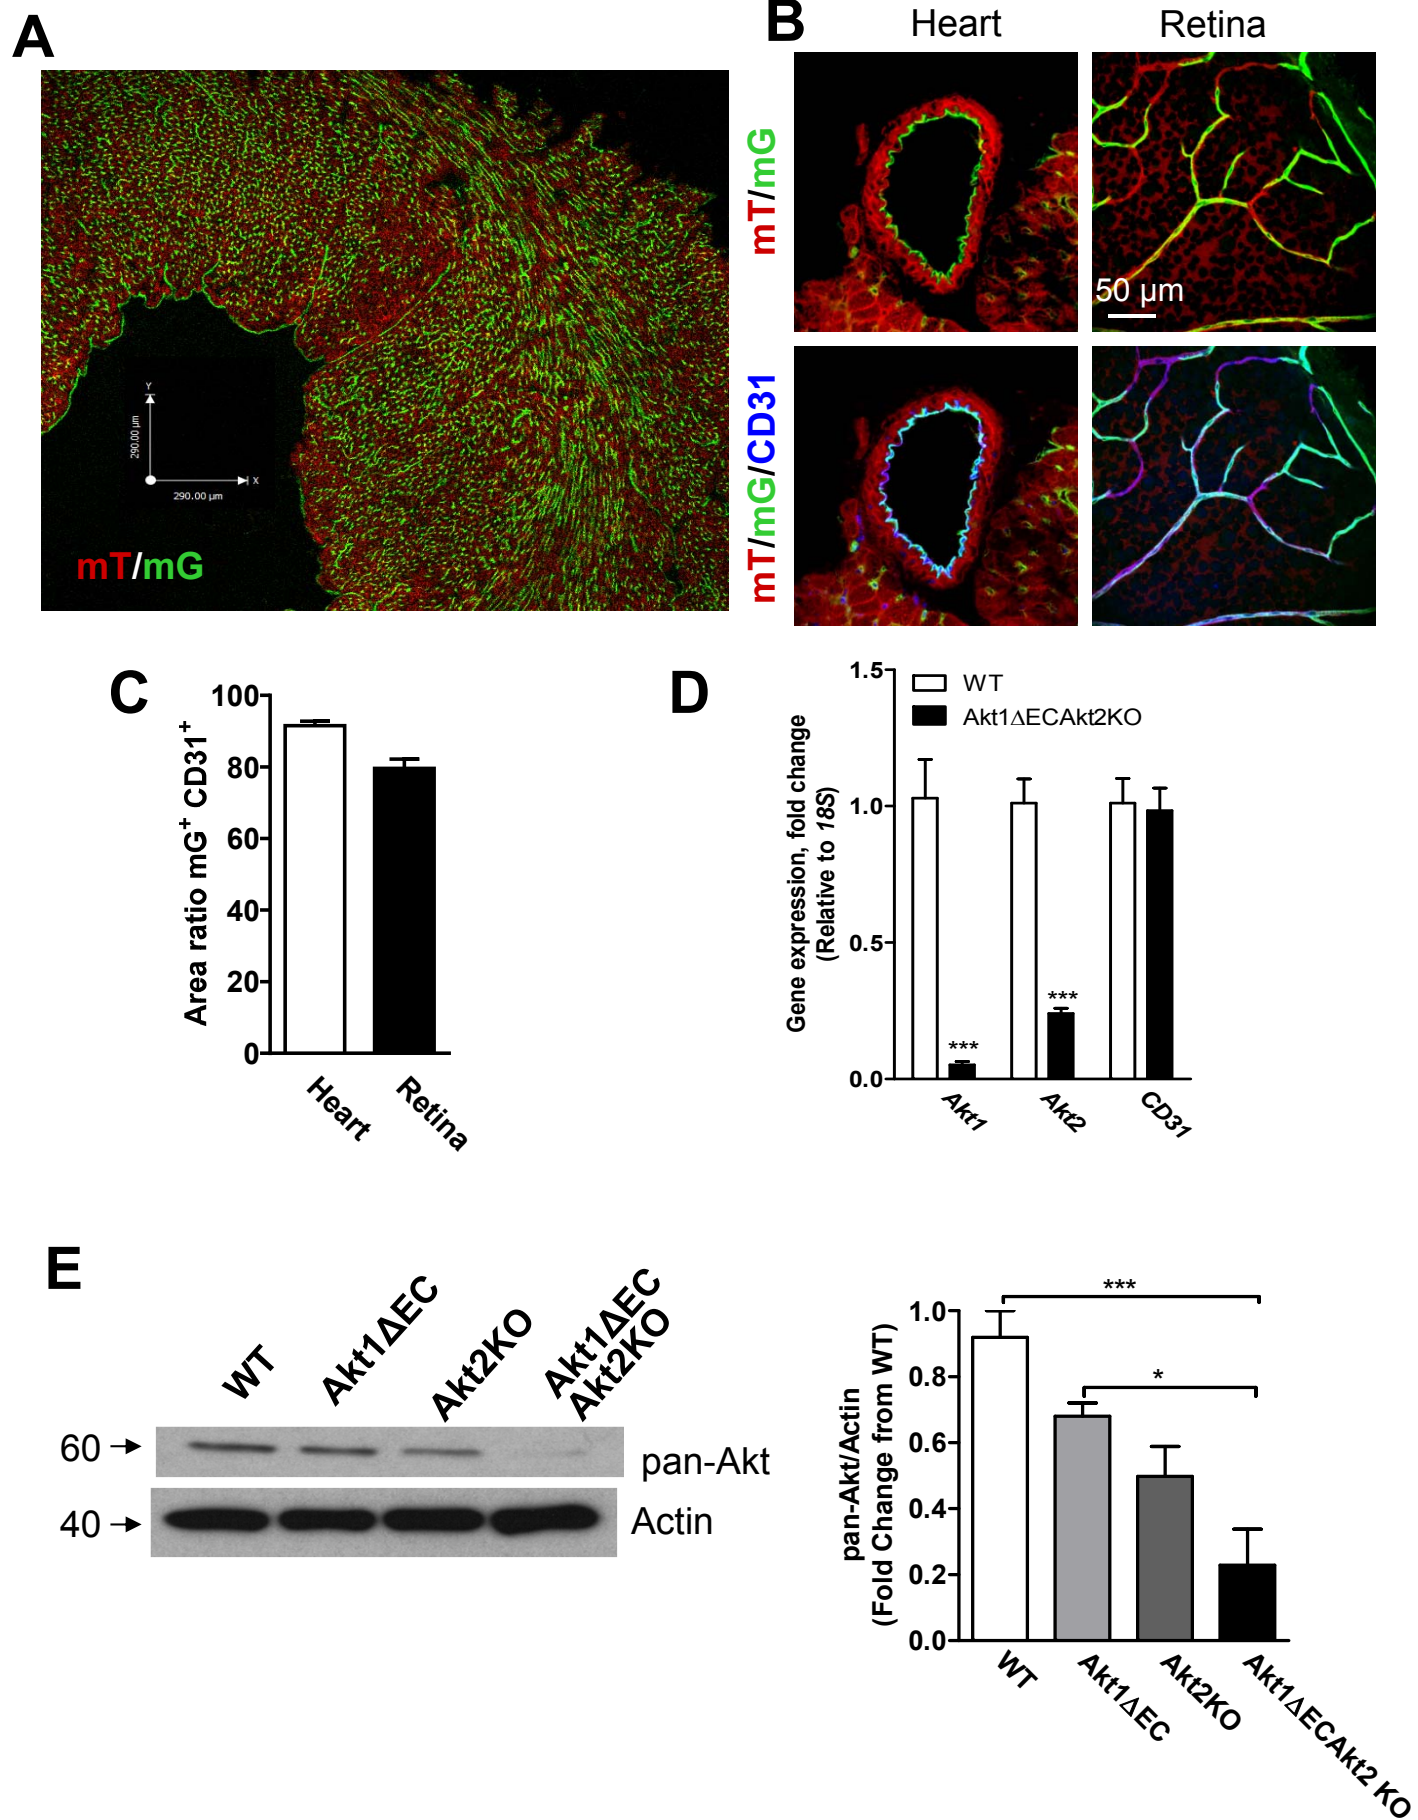

**F**

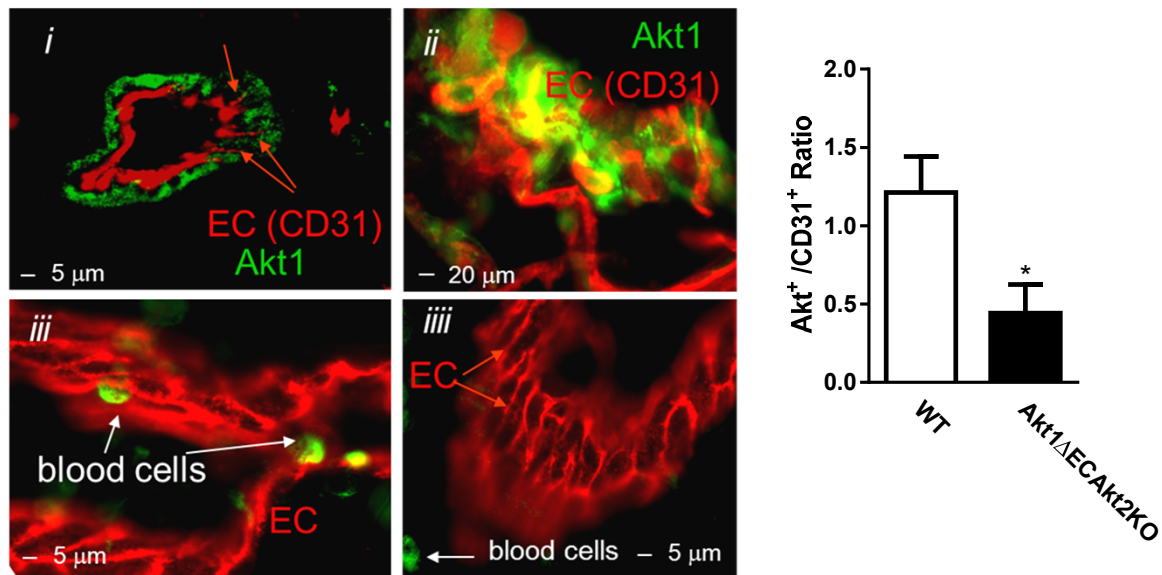

**G**

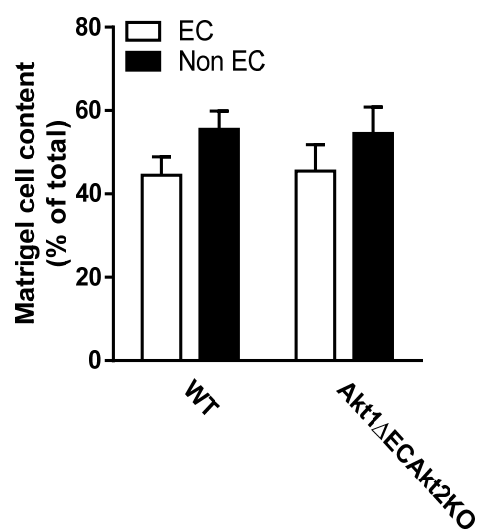

**H**

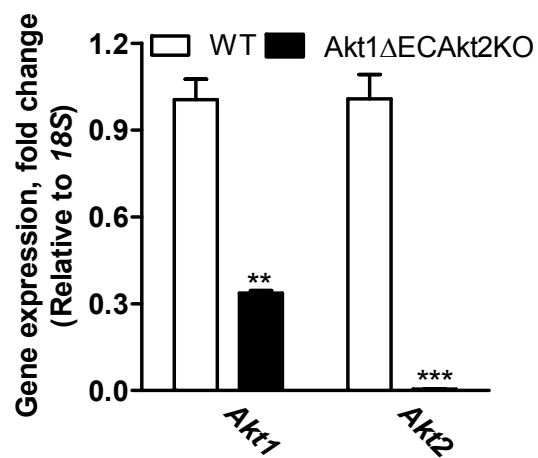

**Supplementary Figure 2. Inducible Akt deletion in endothelial cells *in vitro* and *in vivo*.** (A-C) Representative confocal images of heart sections (A-low and B-high magnification) and whole mount retinas (C) from adult mT/mG;Akt1 $\Delta$ EC;Akt2KO mice treated with 5 days of i.p. tamoxifen and 3 weeks of tamoxifen diet (4 weeks tamoxifen treatment) which express mT (red) in all tissues, and mG (green) in cells where tamoxifen-induced Cre recombinase production results in mG expression and Akt1 deletion. Tissues were also stained with CD31 (blue) to visualize endothelial cells and GFP (green) to amplify the mG signal. Quantification of mG labeled CD31<sup>+</sup> cells represented as mean $\pm$ SEM ( $n=4-5$ ). (D) Gene expression of *Akt1*, *Akt2*, or *CD31* normalized to *18S* in isolated endothelial cells from hearts of tamoxifen treated WT and Akt1 $\Delta$ EC;Akt2KO mice represented as mean fold change from WT $\pm$ SEM ( $n=3$ ). (E) Representative immunoblotting of WT, Akt1 $\Delta$ EC, Akt2KO, and Akt1 $\Delta$ EC;Akt2KO endothelial cell lysates after 3 days of 60ng/mL VEGF treatment followed by 3 days of 1 $\mu$ M tamoxifen treatment and quantitative results showing fold change in pan-Akt (mean $\pm$ SEM ( $n=3$ )) with actin as a loading control. (F) Representative images of matrigel sections from adult WT (*i*, *ii*) and Akt1 $\Delta$ EC;Akt2KO (*iii*, *iiii*) mice treated for 4 weeks with tamoxifen. Sections were stained with Akt1 (green, cytoplasmic or nuclear localization) and CD31 (red, cell junctions, indicated with red arrows) abs. Pictures were taken at the middle of the plugs, where perivascular cells are sparse, therefore, the vast majority of cells are either endothelial or blood cells. Note the presence of Akt1 in blood cells (white arrows) but not in endothelial cells (red arrows show CD31 positive staining at the cell junctions) in Akt1 $\Delta$ EC;Akt2KO (*iii*, *iiii*). Bar graph shows quantification of Akt1<sup>+</sup> /CD31<sup>+</sup> staining ratio in matrigel sections from WT and Akt1 $\Delta$ EC;Akt2KO mice (mean $\pm$ SEM). (G) Percentage of CD31<sup>+</sup> endothelial cell or non-endothelial total cell content in matrigel plugs containing 250ng VEGF after 7 days of growth isolated from WT or Akt1 $\Delta$ EC;Akt2KO mice treated with 4 weeks tamoxifen treatment represented as mean $\pm$ SEM ( $n=4$ ). This demonstrates that only 50% of matrigel plugs are endothelial cells. (H) Gene expression of *Akt1* or *Akt2* normalized to *18S* in matrigel plugs (after 7 days growth with 250ng VEGF) isolated from WT or Akt1 $\Delta$ EC;Akt2KO mice after 4 weeks of tamoxifen treatment represented as mean fold change from WT $\pm$ SEM ( $n=3$ ). \* represents  $p<0.05$ , \*\* represents  $p<0.01$ , and \*\*\* represents  $p<0.005$  by one-way ANOVA (E) or Student's *t* test (C,D,G,H).

# Supplementary Figure 3

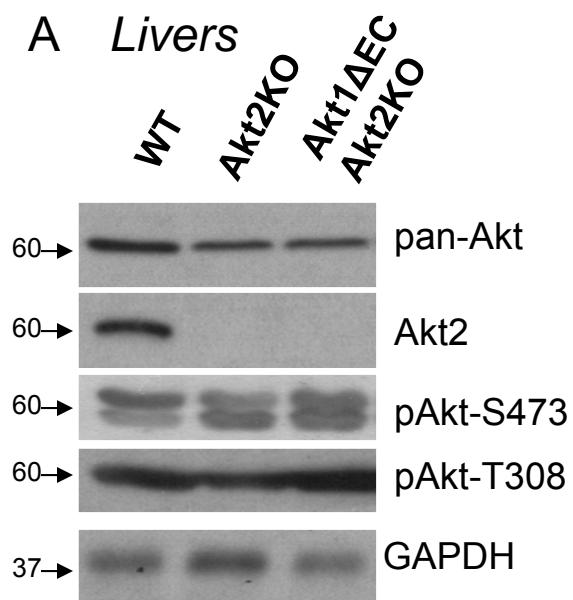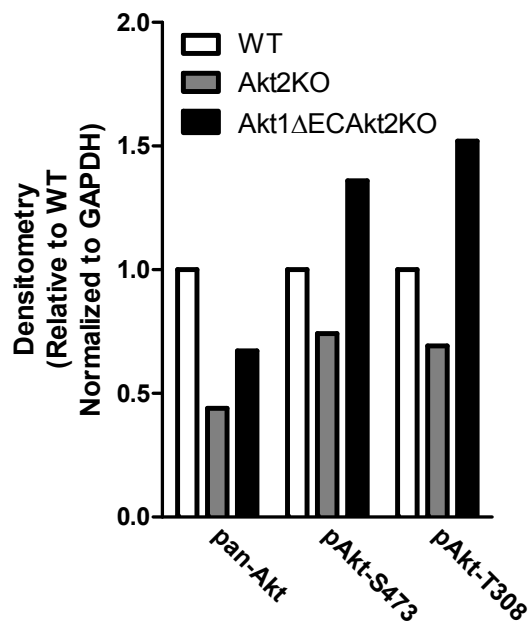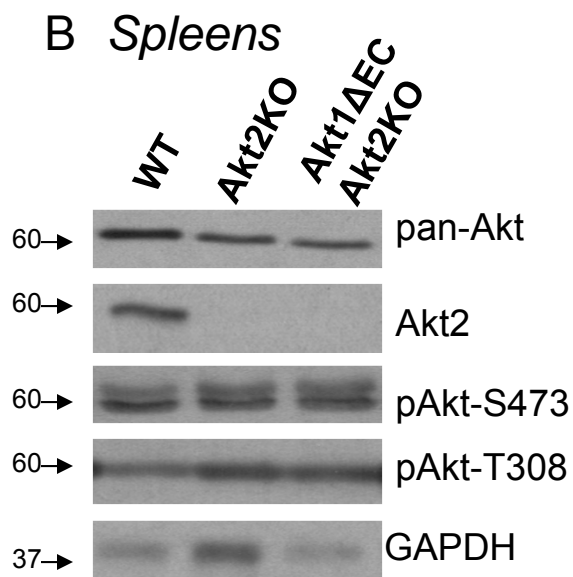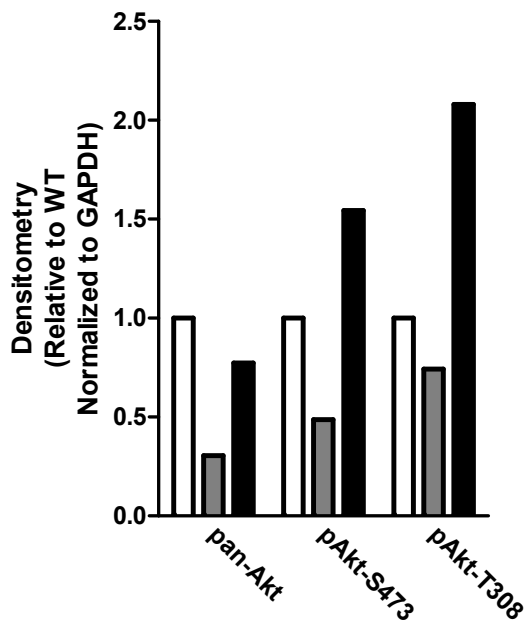

C *Hearts*

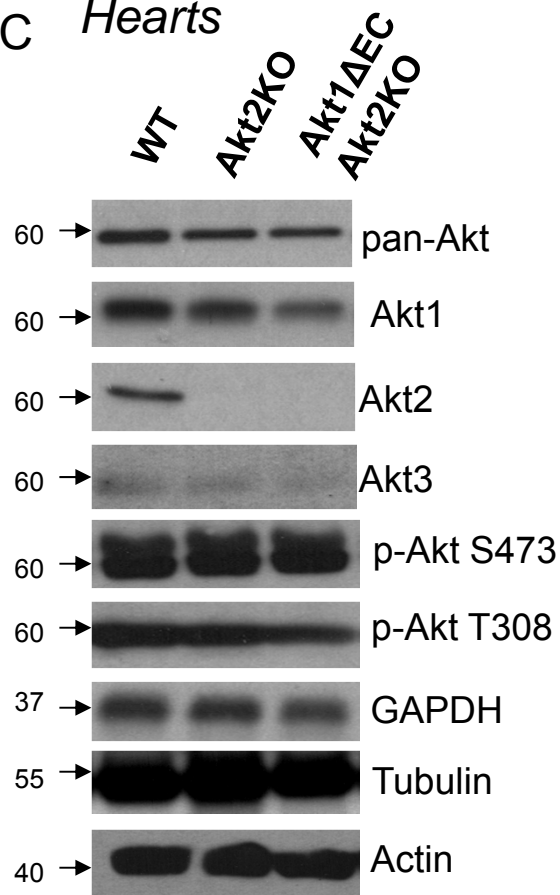

Figure S3

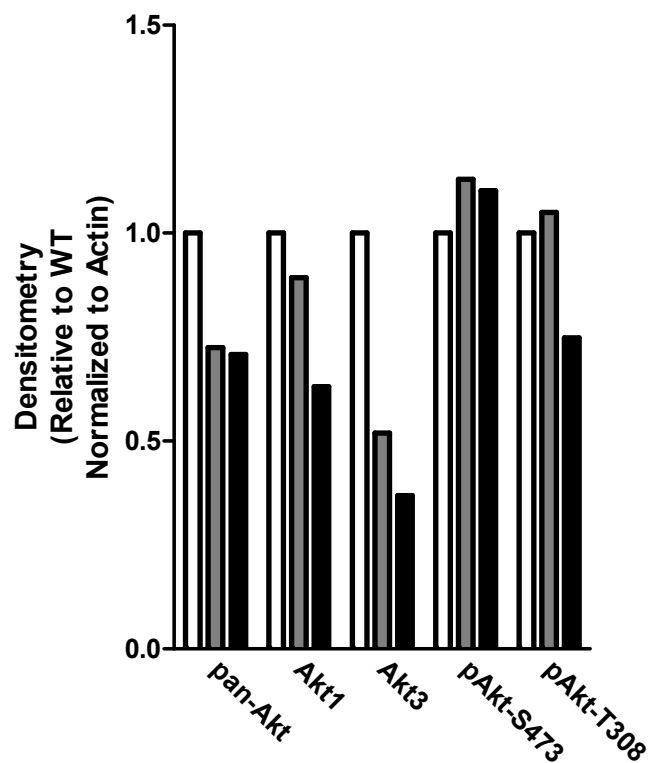

D *Isolated ECs*

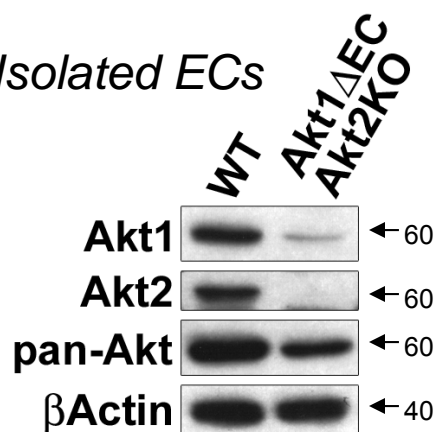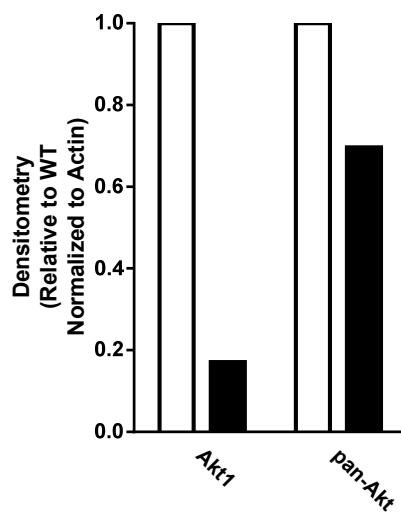

E

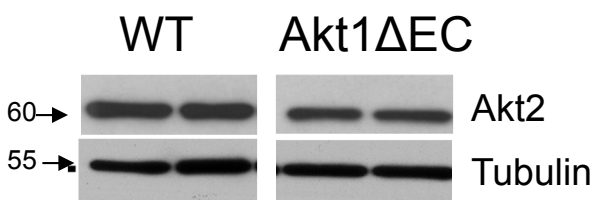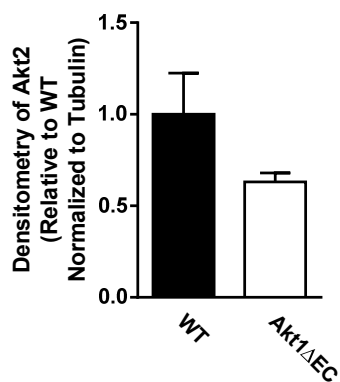

**Supplementary Figure 3. Deletion of Akt1 in endothelial cells diminishes total Akt levels in hearts, but not liver or spleen.** Whole tissue lysates of livers (A), spleens (B), hearts (C) and isolated endothelial cells (D,E) from WT, Akt1 $\Delta$ EC, Akt2KO, or Akt1 $\Delta$ EC;Akt2KO mice after 5 days of tamoxifen injection and 3 weeks of tamoxifen diet (4 weeks tamoxifen treatment) were blotted and probed for Akt2, pan-Akt, pAkt-S473, p-Akt-T308, Akt1, Akt2, Akt3, tubulin, actin, and GAPDH. As expected, deletion of Akt1 in endothelial cells affects only small proportion of cells in a given organ and, therefore, does not substantially change total Akt amounts in whole tissue lysates. Indeed, total Akt levels did not change in livers (A), spleens (B), or lungs (not shown). Out of several organs tested, changes in heart lysates were most profound (C). This result likely reflects the relatively higher proportion of endothelial cells in hearts as compared to livers and spleens, as well as the activity of the VE-cadherin (*Cdh5*) promoter. Maximal and consistent decrease in total Akt levels in whole tissue lysates was observed after 5 days of tamoxifen injections followed by tamoxifen diet until completion of experiments.

## Supplementary Figure 4

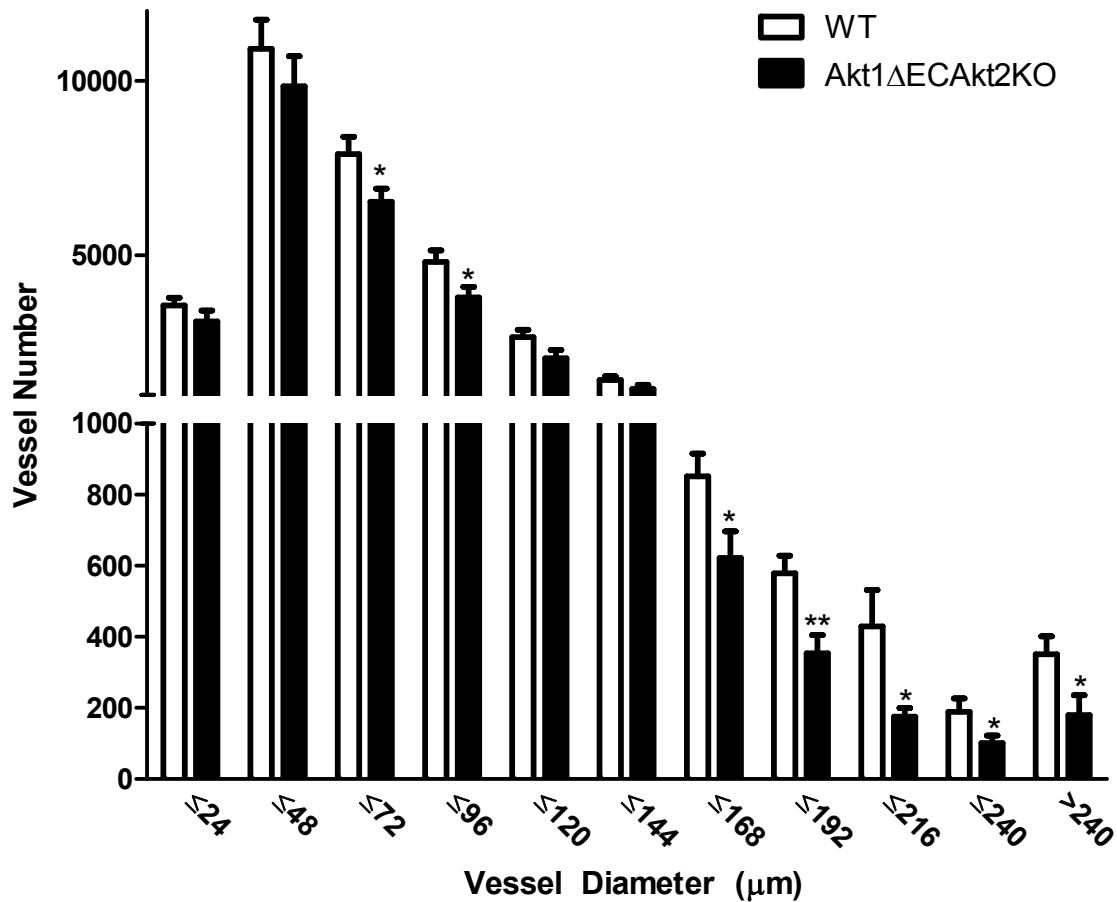

**Supplementary Figure 4. Deletion of Akts in hearts diminishes vascularization.** MicroCT imaging was performed on WT and Akt1 $\Delta$ EC;Akt2KO hearts after 10 weeks of tamoxifen treatment (5 days of i.p. tamoxifen injection followed by 9 weeks of tamoxifen diet). Quantification of the numbers of vessels within each diameter bin represented as mean $\pm$ SEM ( $n=5-7$ ). \* represents  $p<0.05$  and \*\* represents  $p<0.01$  by Student's  $t$  test.

## Supplementary Figure 5

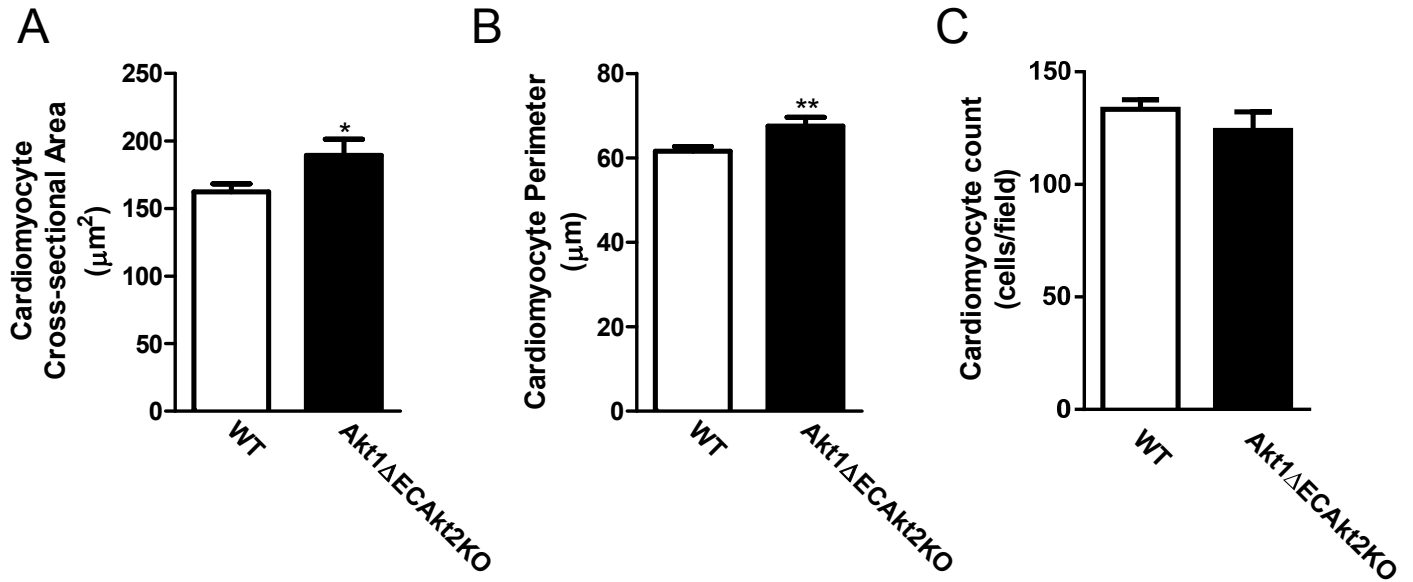

**Supplementary Figure 5. Deletion of Akts in hearts has no significant effect on cardiomyocyte numbers.** Heart sections from WT or Akt1ΔE;Akt2KO mice after 5 days of tamoxifen injection and 3 weeks of tamoxifen diet (4 weeks tamoxifen treatment) were stained with wheat germ agglutinin-488. The area, perimeter and numbers of cardiomyocytes in each field were calculated and represented as mean ± SEM ( $n=9-20$ ). \* represents  $p<0.05$  and \*\* represents  $p<0.01$  by Student's  $t$  test.

## Supplementary Figure 6

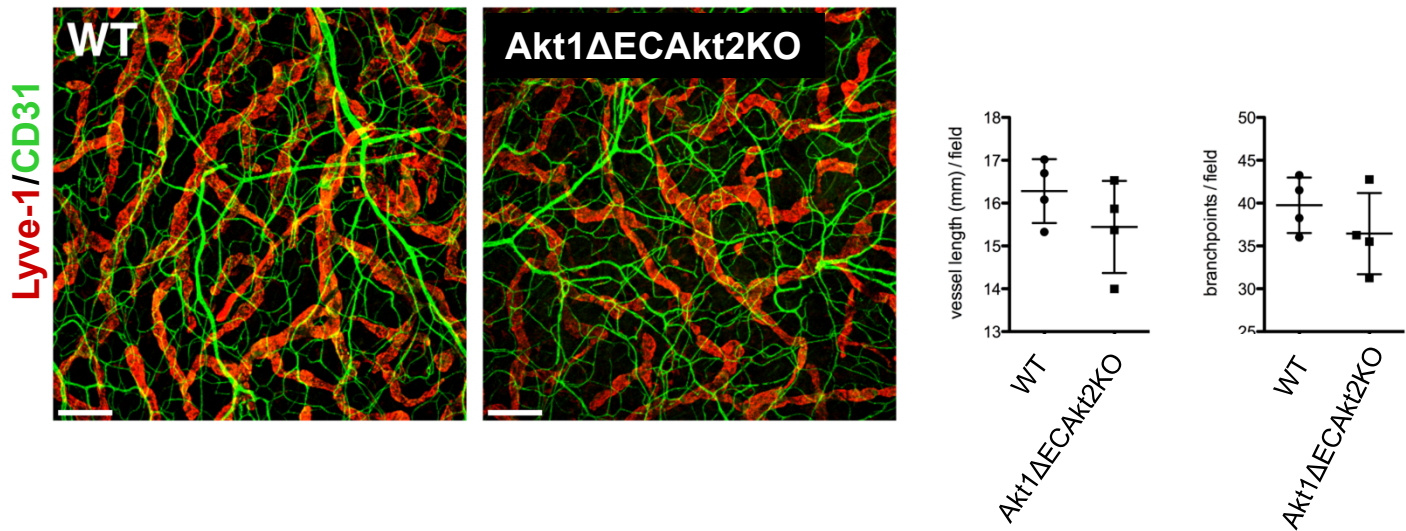

**Supplementary Figure 6. Lymphatic vasculature is not significantly decreased after Akt deletion.** Ears were isolated from WT and Akt1ΔEC;Akt2KO after 4 weeks of tamoxifen treatment and stained with CD31 (Green) and Lyve-1 (Red). Lymphatic vessel length and branch points per field were quantified and represented as mean±SEM ( $n=4$ ).  $p>0.05$

## Supplementary Figure 7

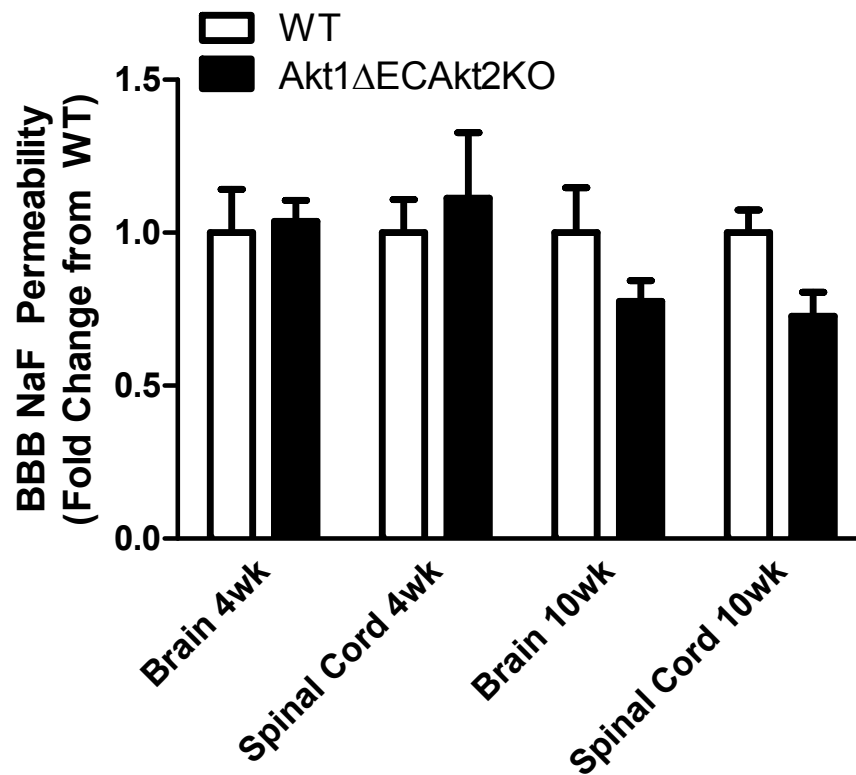

**Supplementary Figure 7. Blood-Brain barrier permeability is not altered after Akt deletion.** WT and Akt1 $\Delta$ EC;Akt2KO mice after 4 weeks or 10 weeks of tamoxifen treatment were injected with NaF prior to sacrifice. Brains and spinal cords were isolated and levels of NaF in tissues were quantified and represented as mean $\pm$ SEM ( $n=4$ ).

## Supplementary Figure 8

**A**

WT

NG2/SMA/Isolectin B4

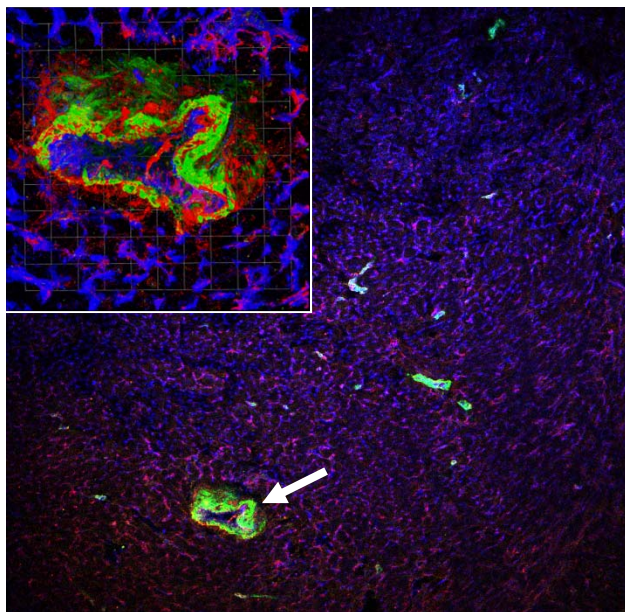

**B**

Akt1 $\Delta$ ECAkt2KO

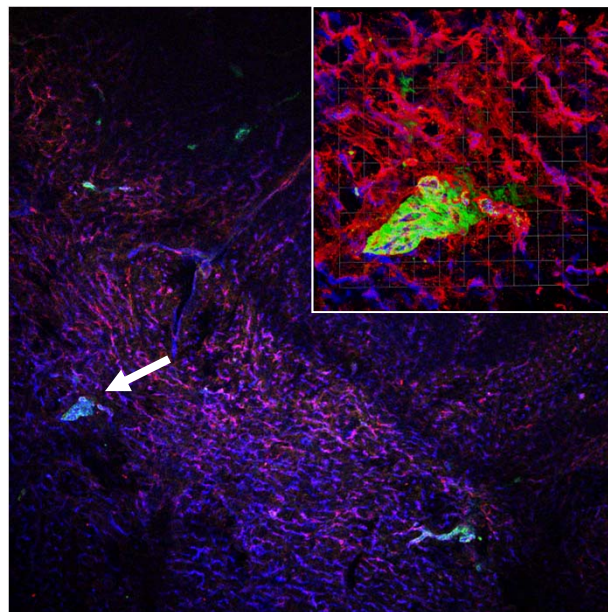

**C**

WT

Akt1 $\Delta$ EC Akt2KO

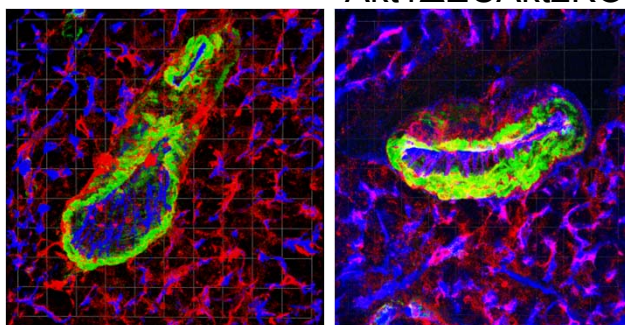

**D**

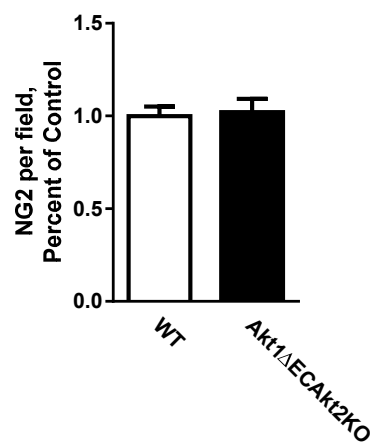

**E** WT

NG2/SMA/Isolectin B4

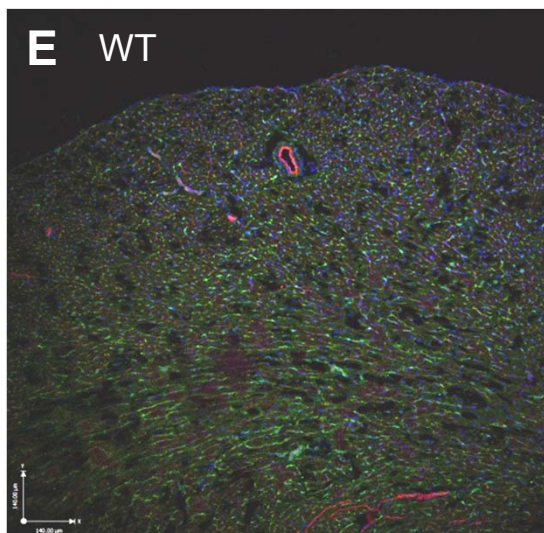

**F** Akt1 $\Delta$ EC Akt2KO

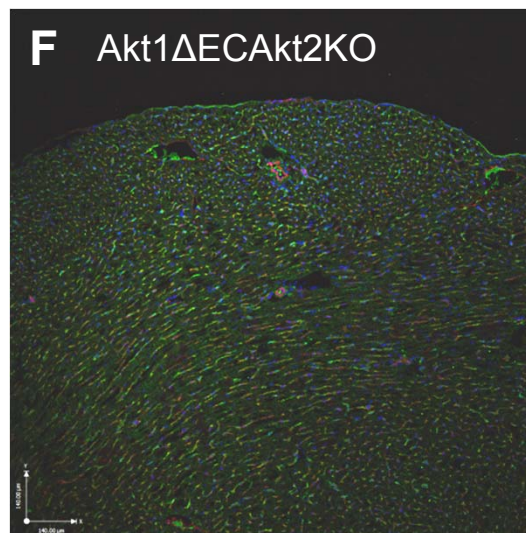

**Supplementary Figure 8. Deletion of Akts does not diminish pericyte numbers or pericyte association with endothelial cells.** (A-C) Representative images of WT or Akt1 $\Delta$ EC;Akt2KO heart sections of various thickness, 100  $\mu$ M (A-B) and 30  $\mu$ M (C) 10 weeks after tamoxifen treatment stained for isolectin B4 (blue), SMA (green) and NG2 (red). 3D reconstruction was performed using Volocity to observe associations between pericytes and endothelium and the snapshots of 3D images are shown in inserts. No reduction in pericyte numbers was observed in Akt1 $\Delta$ EC;Akt2KO mice as compared to WT mice. Likewise, no substantial changes in pericyte-endothelial associations were found (Average Pearson coefficients- WT: 0.171, Akt1 $\Delta$ EC;Akt2KO: 0.204,  $p=0.13$ ). (D) The area of NG2 positive staining was quantified at 5X (entire cross section of heart) and represented as mean  $\pm$  SEM ( $n=14$ ). (E,F) Low magnification images showing NG2 staining (green), isolectin (blue) and SMA (red) in cross sections of WT (E) and Akt1 $\Delta$ EC;Akt2KO (F) hearts, all 10 weeks on tamoxifen.

## Supplementary Figure 9

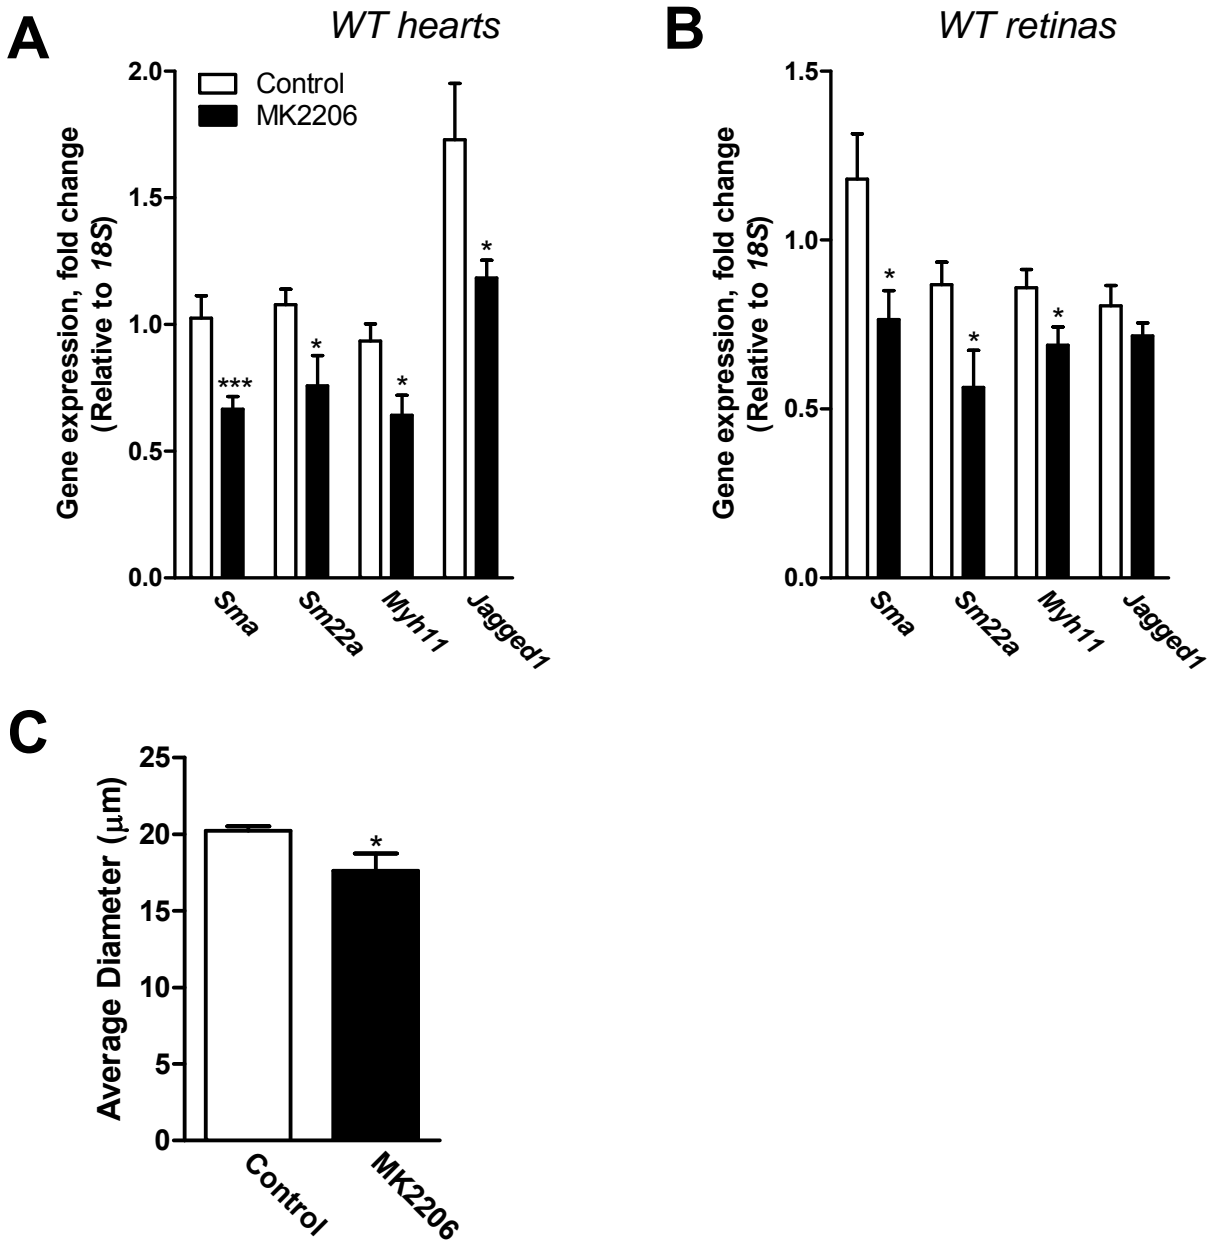

**Supplementary Figure 9. Inhibition of Akt by MK2206 in mice resembles the phenotype seen in *Akt1 $\Delta$ EC;Akt2KO*.** Gene expression normalized to 18S in WT hearts (A) and retinas (B) from mice after 2 weeks of 120 mg/kg MK2206 or vehicle control (30% captisol) treatment represented as mean fold change from control $\pm$ SEM ( $n=4$ ). (C) The average diameter of vessels within retinas was calculated and represented as mean $\pm$ SEM ( $n=3$ ). \* represents  $p<0.05$  by Student's  $t$  test.

## Supplementary Figure 10

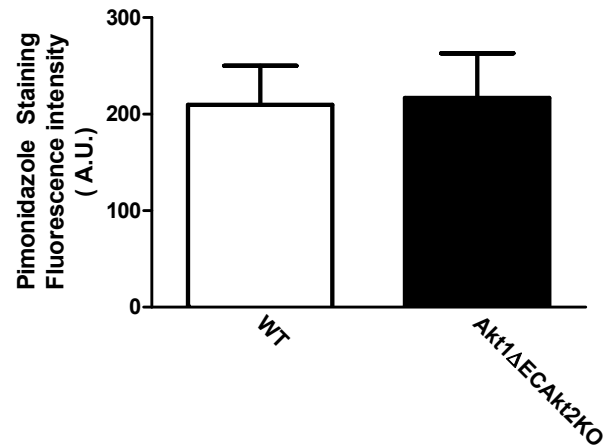

**Supplementary Figure 10. Akt deletion has no effect on heart hypoxia.** WT or Akt1ΔEC;Akt2KO mice treated with tamoxifen for 10 weeks (5 days of i.p. tamoxifen injection followed by 9 weeks of tamoxifen diet) were injected with 60mg/kg pimonidazole an hour prior to sacrifice. Heart sections were examined by immunofluorescence for pimonidazole and the fluorescence intensity was calculated and mean  $\pm$  SEM ( $n=4-5$ ).

## Supplementary Figure 11

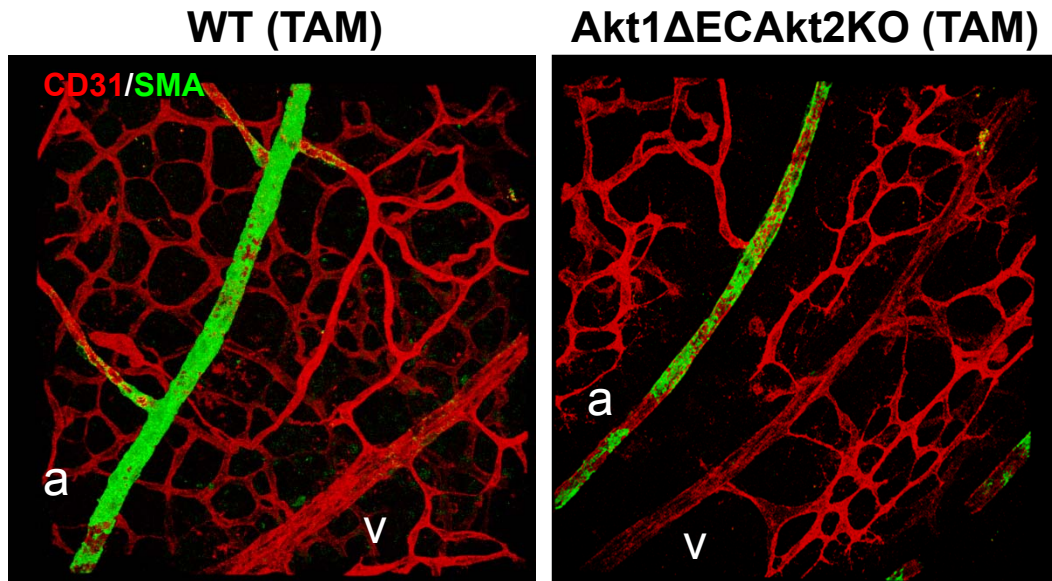

**Supplementary Figure 11. Early deletion of Akts results in dramatically reduced VSMC coverage and diminished branching of retinal vasculature.** Representative images of whole mount retinas collected at P10 from WT and Akt1 $\Delta$ EC;Akt2KO mice ( $n=6$ ). Tamoxifen was orally administered starting at P2 for 4 days. Retinas were stained for CD31 (red) to visualize endothelial cells and SMA to visualize VSMC (green).

## Supplementary Figure 12

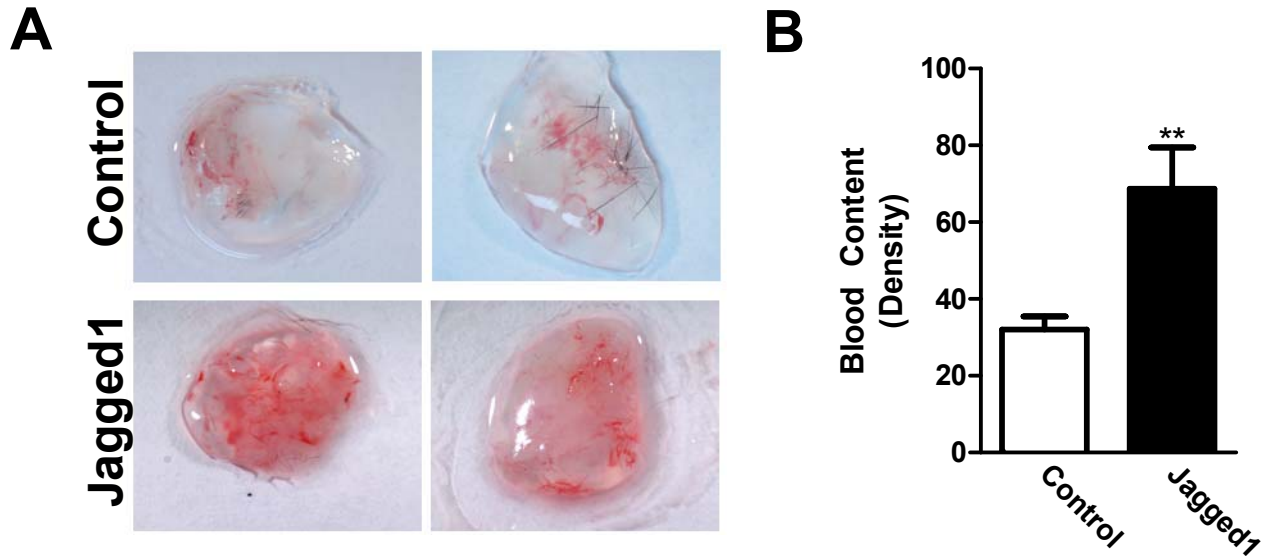

**Supplementary Figure 12. Re-expression of Jagged-1 in Akt1 $\Delta$ EC;Akt2KO endothelial cells improves vascularization and perfusion.** (A) Representative images of matrigels containing control or Jagged1 retrovirus infected Akt1 $\Delta$ EC;Akt2KO ECs after injection into WT mice after 4 weeks tamoxifen treatment. (B) Quantification of perfused vasculature based on blood content is presented as mean density $\pm$ SEM ( $n=9-10$ ). \*\* represents  $p<0.01$  by Student's  $t$  test.

## Supplementary Figure 13

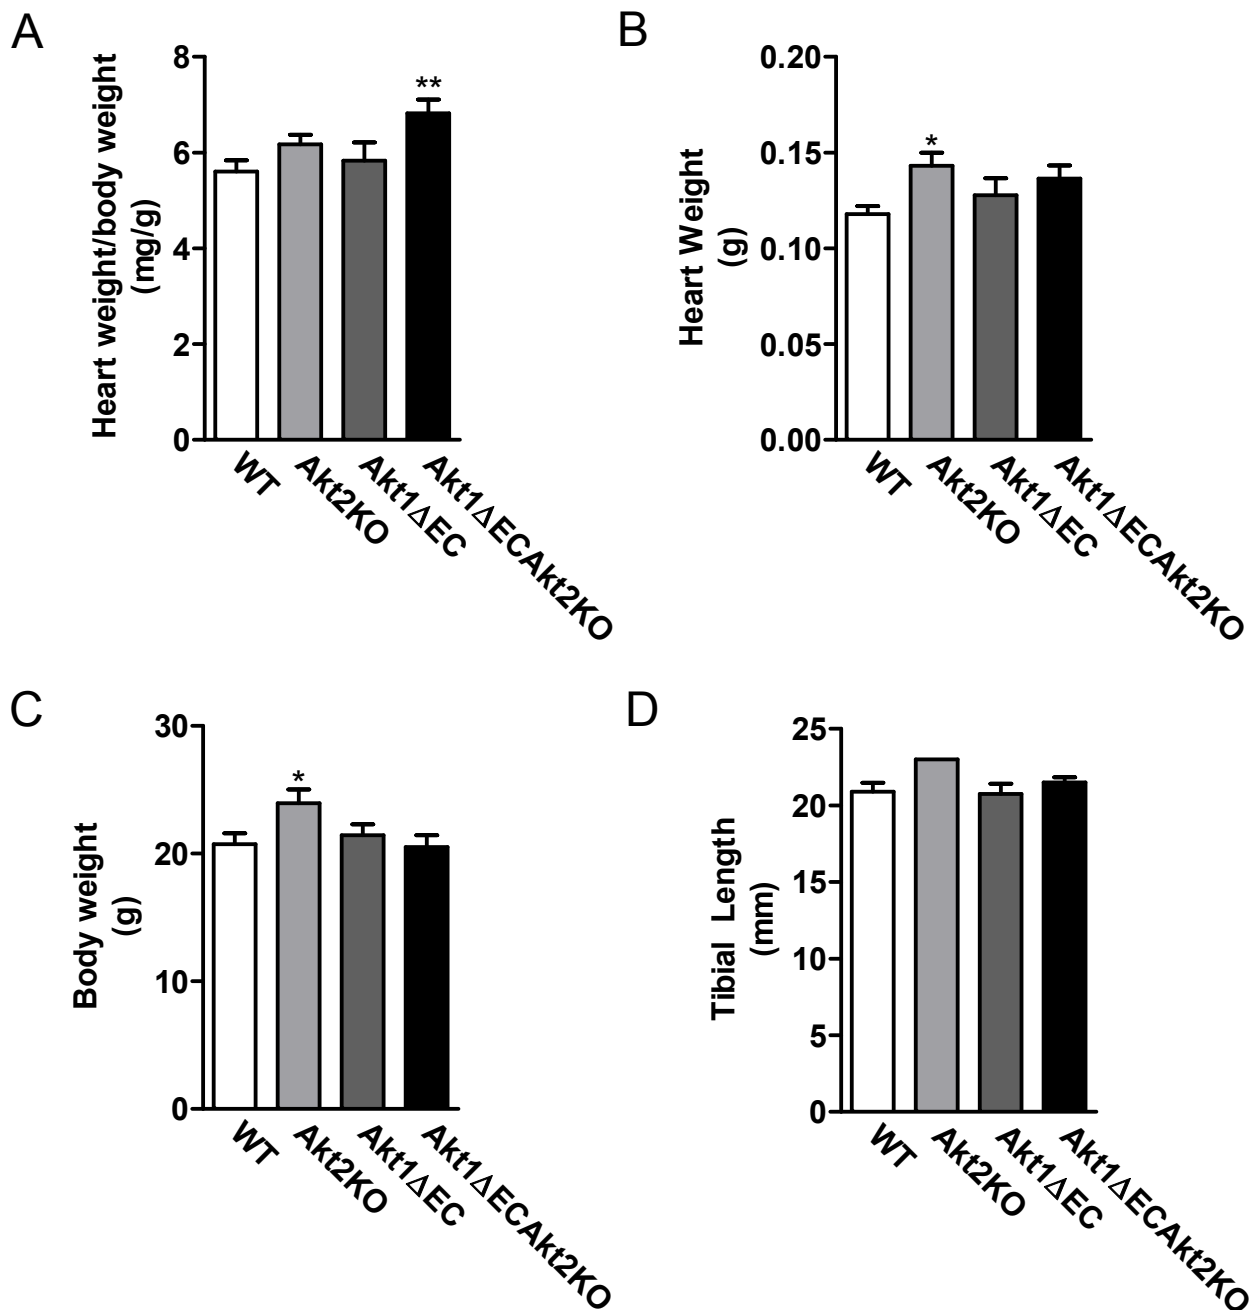

**Supplementary Figure 13. Akt deletion in Akt1ΔEC;Akt2KO results in increased heart weight.** Heart weight-to-body weight ratios (A), heart weights (B) body weights (C), and tibial lengths (D) of WT, Akt2KO, Akt1ΔEC or Akt1ΔEC;Akt2KO mice treated with tamoxifen for 4 weeks (5 days of i.p. tamoxifen injection followed by 3 weeks of tamoxifen diet). The data are represented as mean ± SEM ( $n=9-20$ ). \*\* represents  $p<0.01$  by one-way ANOVA.

## Supplementary Figure 14

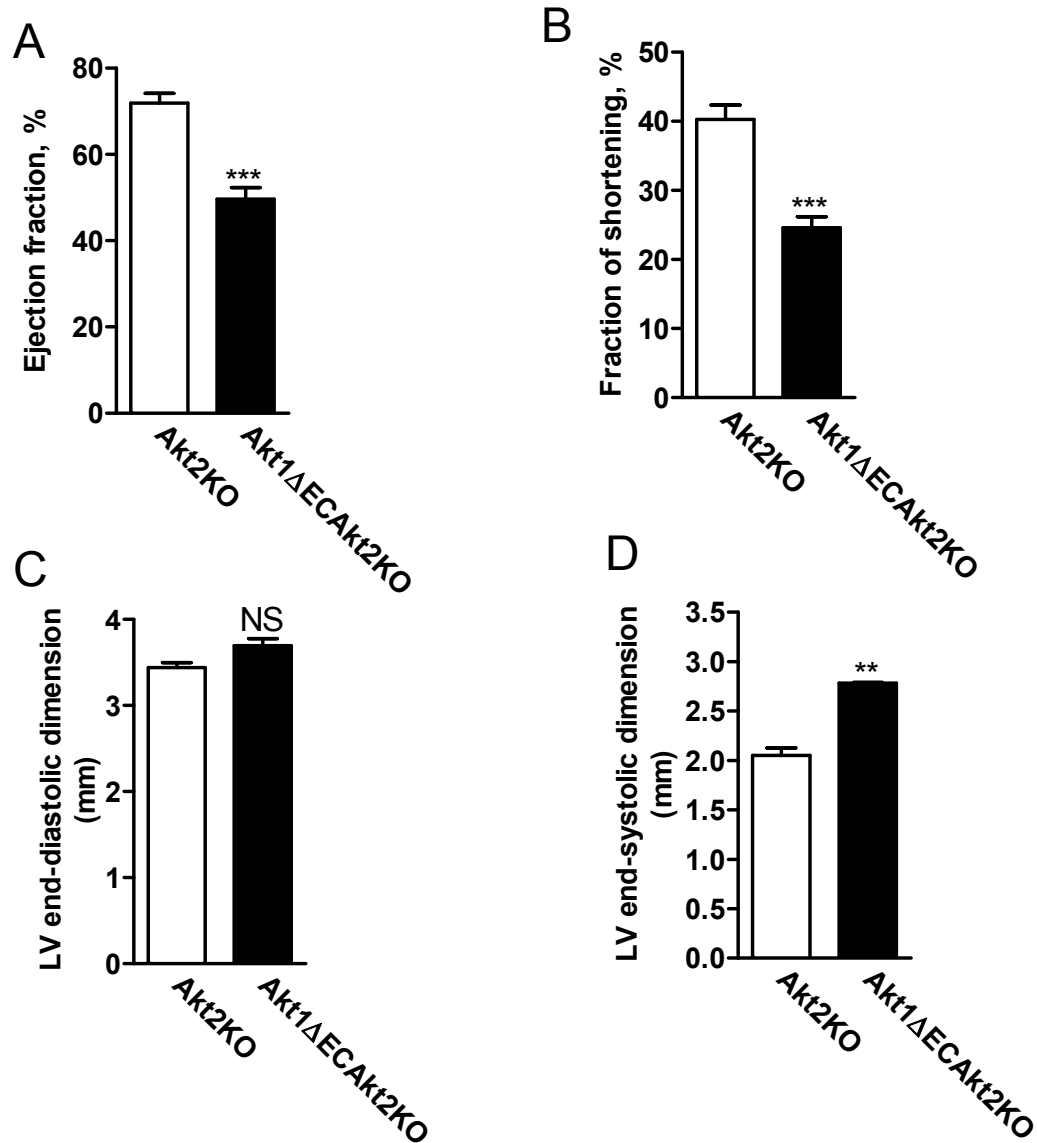

**Supplementary Figure 14. Akt1 excision in endothelial cells causes dramatic changes in cardiac function.** LVEDD, LVESD, percentage of fractional shortening, and percentage of ejection fraction calculated from echocardiography of Akt2KO and Akt1ΔEC;Akt2KO mice after 10 weeks of tamoxifen treatment (5 days of i.p. tamoxifen injection followed by 9 weeks of tamoxifen diet) representing mean±SEM ( $n=4-6$ ). \*\* represents  $p<0.01$ , \*\*\* represents  $p<0.005$  and NS represents not significant ( $p>0.05$ ) by Student's  $t$  test.

## Supplementary Figure 15

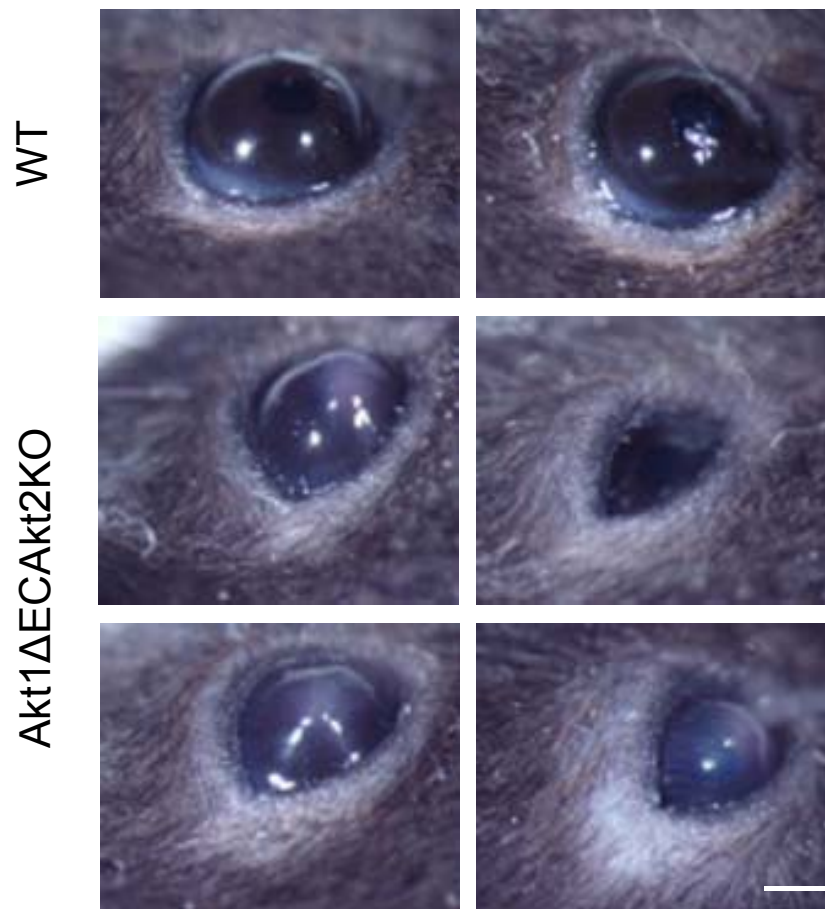

**Supplementary Figure 15. Akt deletion in Akt1 $\Delta$ EC;Akt2KO induces corneal ulcers.** Representative images of eyes from WT or Akt1 $\Delta$ EC;Akt2KO mice treated with tamoxifen for 4 weeks (5 days of i.p. tamoxifen injection followed by 3 weeks of tamoxifen diet).  $n > 50$  mice per group. Scale bar represents 1 mm.

## Supplementary Figure 16

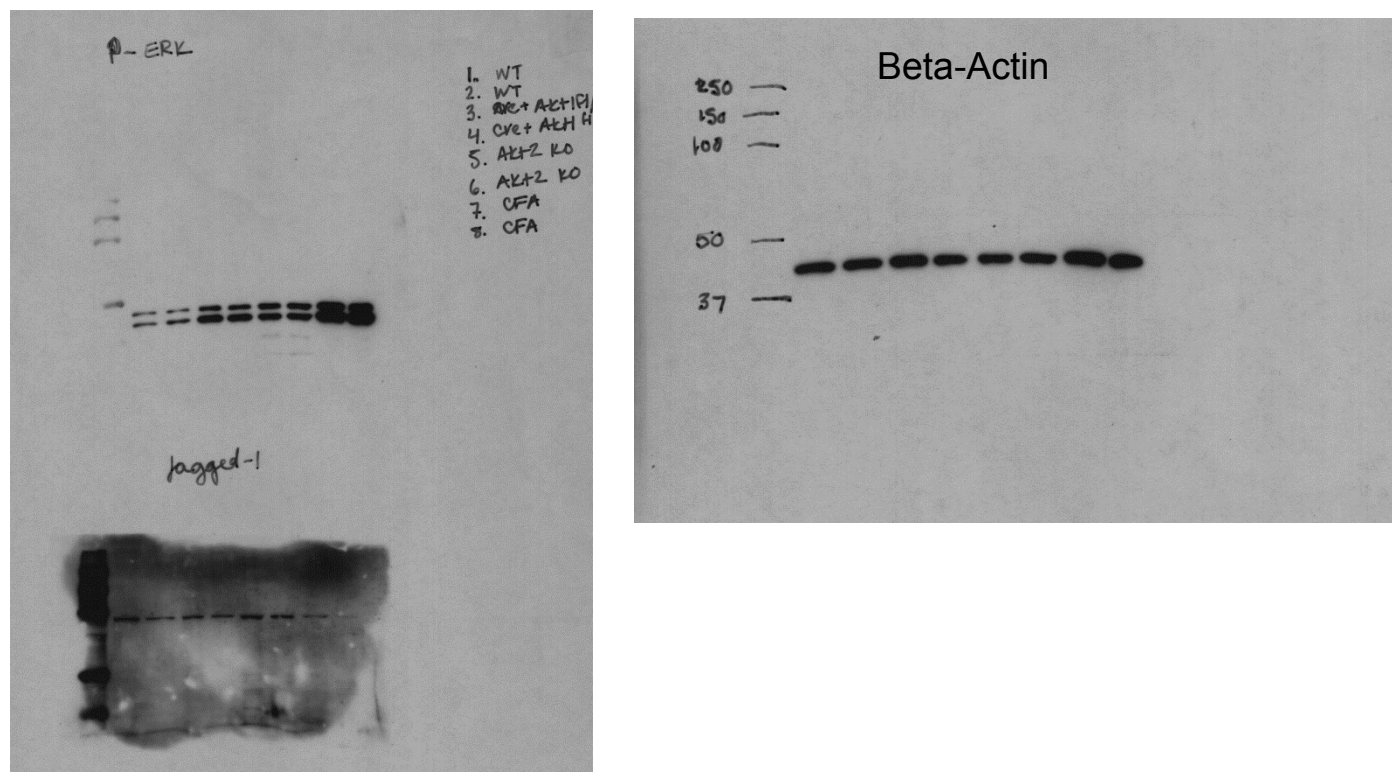

Films of Immunoblots from Figure 5D.

Supplementary Figure 16

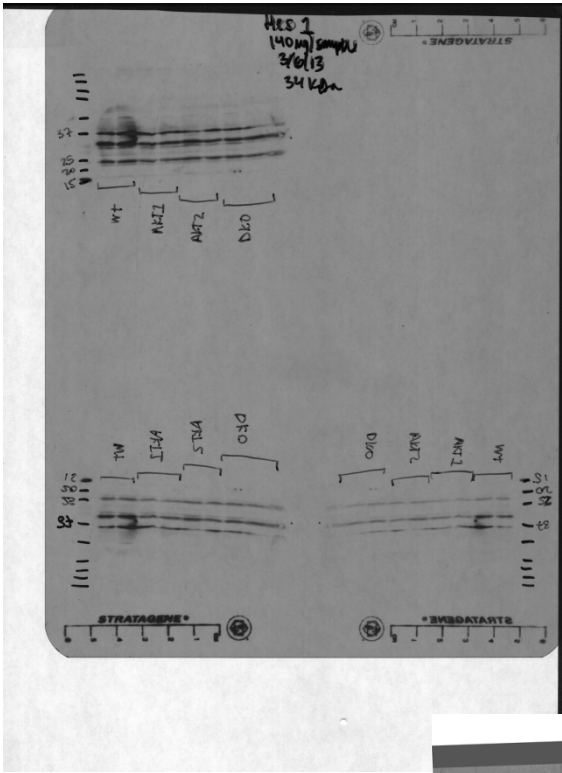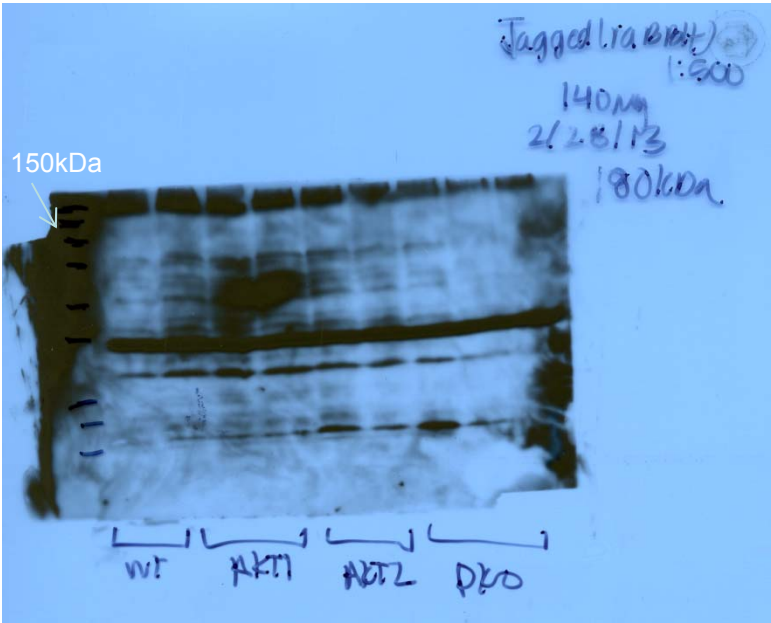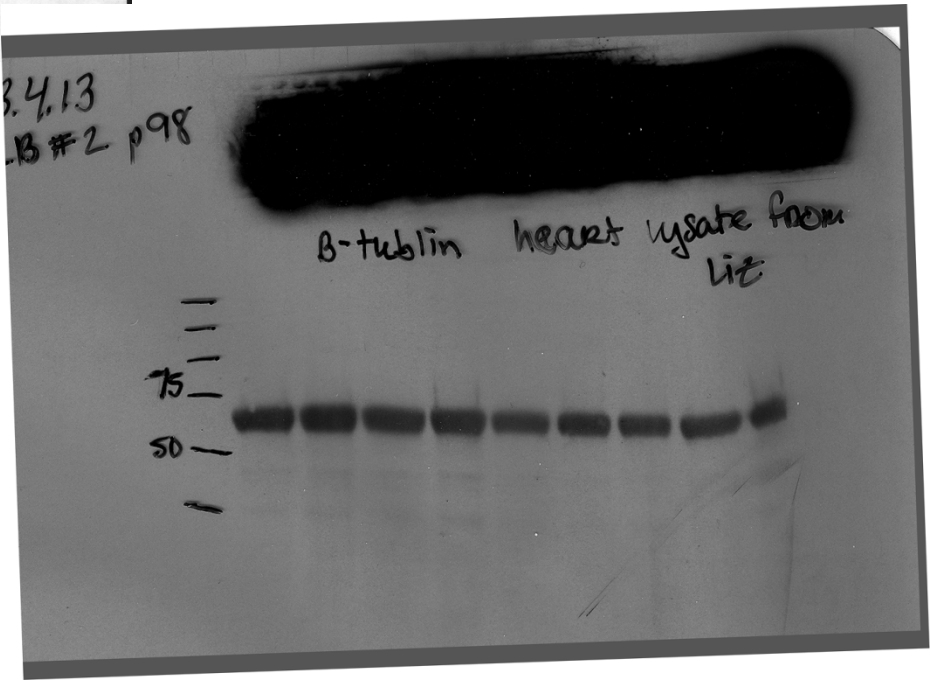

Films of Immunoblots from Figure 5E.

Supplementary Figure 16

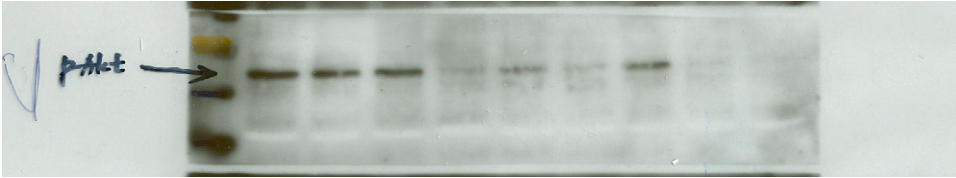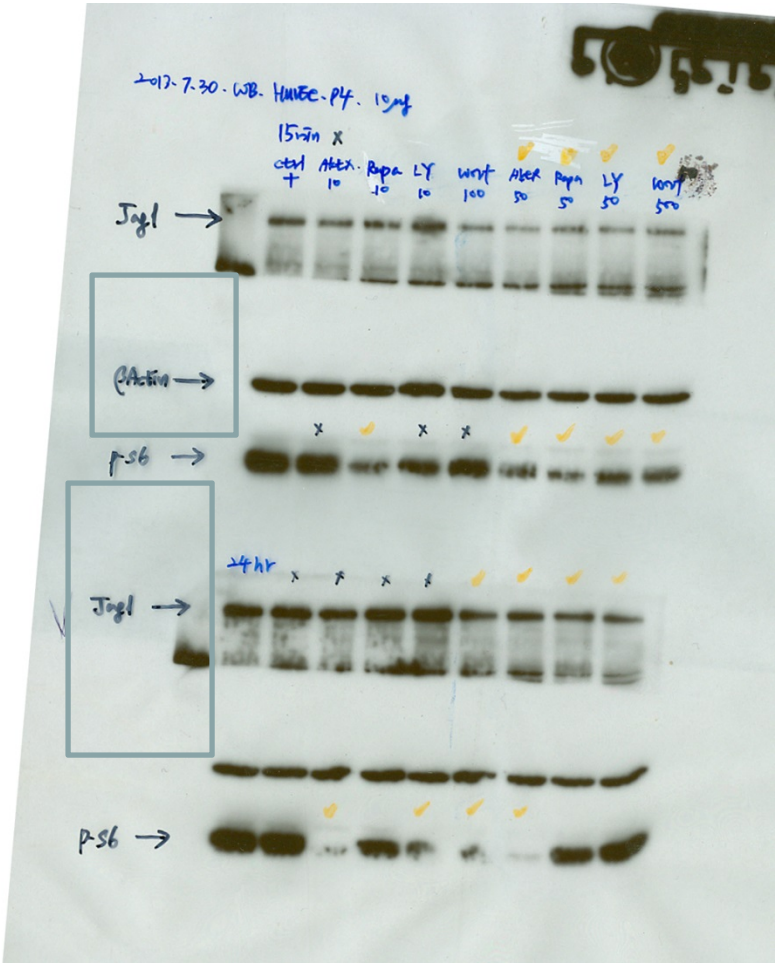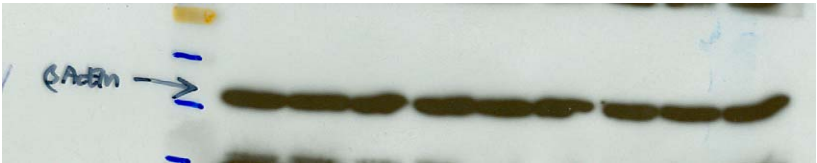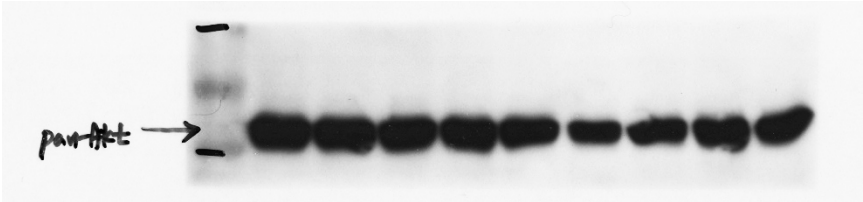

Films of Immunoblots from Figure 5F.

SUPPLEMENTARY TABLE 1

| Increased expression >1.5 fold                                                                                                                                                                                                                                                                                                                                                                                                                                                                                                               | Decreased expression <-1.5 fold                                                                                                                                                                                                                                                                                                                                                                                                                                                                                                                                                                                                                                                                                                                                                                                                                                                                                                                                                                                                                                                                                                                                  | Not Significantly Altered                                                                                                                                                                                                                                                                                                                                                                                                                                                                                                                                                                                                                                                                                                                                                                                                                                                                                                                                                                                                                                                                                                                                   |
|----------------------------------------------------------------------------------------------------------------------------------------------------------------------------------------------------------------------------------------------------------------------------------------------------------------------------------------------------------------------------------------------------------------------------------------------------------------------------------------------------------------------------------------------|------------------------------------------------------------------------------------------------------------------------------------------------------------------------------------------------------------------------------------------------------------------------------------------------------------------------------------------------------------------------------------------------------------------------------------------------------------------------------------------------------------------------------------------------------------------------------------------------------------------------------------------------------------------------------------------------------------------------------------------------------------------------------------------------------------------------------------------------------------------------------------------------------------------------------------------------------------------------------------------------------------------------------------------------------------------------------------------------------------------------------------------------------------------|-------------------------------------------------------------------------------------------------------------------------------------------------------------------------------------------------------------------------------------------------------------------------------------------------------------------------------------------------------------------------------------------------------------------------------------------------------------------------------------------------------------------------------------------------------------------------------------------------------------------------------------------------------------------------------------------------------------------------------------------------------------------------------------------------------------------------------------------------------------------------------------------------------------------------------------------------------------------------------------------------------------------------------------------------------------------------------------------------------------------------------------------------------------|
| <p>Fatty acid binding protein 7 (<i>Fabp7</i>)</p> <p>FMS-like tyrosine kinase 1; VEGFR1 (<i>Flt1</i>)</p> <p>Inhibitor of DNA binding 4 (<i>Id4</i>)</p> <p>LFNG O-fucosylpeptide 3-beta-N-acetylglucosaminyltransferase; lunatic fringe (<i>Lfng</i>)</p> <p>Prostaglandin-endoperoxide synthase 2; Cox-2 (<i>Ptgs2</i>)</p> <p>Runt related transcription factor 2 (<i>Runx2</i>)</p> <p>Sphingosine phosphate lysase 1 (<i>Sgpl1</i>)</p> <p>Tenascin C (<i>Tnc</i>)</p> <p>Wingless-related MMTV integration site 5A (<i>Wnt5a</i>)</p> | <p>Brain derived neurotrophic factor (<i>Bdnf</i>)</p> <p>Core-binding factor, runt domain, alpha subunit 2, translocated to 3 (<i>Cbfa2t3</i>)</p> <p>Cyclin D1 (<i>Ccnd1</i>)</p> <p>CREB binding protein; CBP (<i>Crebbp</i>)</p> <p>Chemokine (C-X3-C motif) ligand 1 (<i>Cx3cl1</i>)</p> <p>Chemokine (C-X-C motif) ligand 12 (<i>Cxcl12</i>)</p> <p>Dickkopf homolog 1 (<i>Dkk1</i>)</p> <p>Deltx 1 homolog (<i>Dtx1</i>)</p> <p>Endothelin 1 (<i>Edn1</i>)</p> <p>Early growth response 3 (<i>Egr3</i>)</p> <p>Four jointed box 1 (<i>Fjx1</i>)</p> <p>Forkhead box C1 (<i>Foxc1</i>)</p> <p>Forkhead box D3 (<i>Foxd3</i>)</p> <p>Forkhead box F1a (<i>Foxf1</i>)</p> <p>Growth arrest and DNA-damage inducible 45 beta; MyD118 (<i>Gadd45b</i>)</p> <p>G-protein signaling modulator 2 (<i>Gpsm2</i>)</p> <p>Hairy and enhancer of split 1 (<i>Hes1</i>)</p> <p>Hairy and enhancer of split 5 (<i>Hes5</i>)</p> <p>Hairy and enhancer of split 7 (<i>Hes7</i>)</p> <p>Hairy/enhancer-of-split related with YRPW motif 1 (<i>Hey1</i>)</p> <p>Hairy/enhancer-of-split related with YRPW motif 2 (<i>Hey2</i>)</p> <p>Hairy/enhancer-of-split related</p> | <p>c-Abl (<i>Abl1</i>)</p> <p>A disintegrin-like and metallopeptidase with thrombospondin type 1 motif; ADAMTS-1 (<i>Adamts1</i>)</p> <p>Cyclin D2 (<i>Ccnd2</i>)</p> <p>Circadian locomotor output cycles kaput (<i>Clock</i>)</p> <p>Chemokine (C-X-C motif) ligand 1 (<i>Cxcl1</i>)</p> <p>Ephrin A1 (<i>Efnal</i>)</p> <p>Ephrin B1 (<i>Efnb1</i>)</p> <p>Frizzled-related protein (<i>Frzb</i>)</p> <p>Frizzled homolog 5 (<i>Fzd5</i>)</p> <p>Heparin-binding EGF-like growth factor (<i>Hbegf</i>)</p> <p>Insulin-like growth factor binding protein 3 (<i>Igfbp3</i>)</p> <p>Kalirin; Rho GEF kinase (<i>Kalrn</i>)</p> <p>MAP/microtubule affinity-regulating kinase 1 (<i>Mark1</i>)</p> <p>Nicotinamide phosphoribosyltransferase (<i>Nampt</i>)</p> <p>Pre B-cell leukemia transcription factor 1 (<i>Pbx1</i>)</p> <p>Platelet derived growth factor receptor, beta polypeptide (<i>Pdgfrb</i>)</p> <p>Recombination signal binding protein for immunoglobulin kappa J region (<i>Rbpj</i>)</p> <p>Rho family GTPase 1 (<i>Rnd1</i>)</p> <p>SNW domain containing (<i>Snw1</i>)</p> <p>Vascular endothelial growth factor A (<i>Vegfa</i>)</p> |

|  |                                                                                                                                                                                                                                                                                                                                                                                                                                                                                                                                                                                                                                                                                                                                                                                                                                                                                                                                                                                                                                                                                                                                                                                                                                                                                                                                                       |  |
|--|-------------------------------------------------------------------------------------------------------------------------------------------------------------------------------------------------------------------------------------------------------------------------------------------------------------------------------------------------------------------------------------------------------------------------------------------------------------------------------------------------------------------------------------------------------------------------------------------------------------------------------------------------------------------------------------------------------------------------------------------------------------------------------------------------------------------------------------------------------------------------------------------------------------------------------------------------------------------------------------------------------------------------------------------------------------------------------------------------------------------------------------------------------------------------------------------------------------------------------------------------------------------------------------------------------------------------------------------------------|--|
|  | <p>with YRPW motif-like (<i>Heyl</i>)</p> <p>Heat shock protein 8 (<i>Hspb8</i>)</p> <p>Inhibitor of DNA binding 1 (<i>Id1</i>)</p> <p>Inhibitor of DNA binding 2 (<i>Id2</i>)</p> <p>Inhibitor of DNA binding 3 (<i>Id3</i>)</p> <p>Interleukin 33 (<i>Il33</i>)</p> <p>Jagged1 (<i>Jag1</i>)</p> <p>Jun oncogene; c-Jun (<i>Jun</i>)</p> <p>Kit ligand; SCF (<i>Kitl</i>)</p> <p>Keratin 14 (<i>Krt14</i>)</p> <p>Musculin (<i>Msc</i>)</p> <p>Myogenic factor 5 (<i>Myf5</i>)</p> <p>Nestin (<i>Nes</i>)</p> <p>Nodal (<i>Nodal</i>)</p> <p>Notch gene homolog 1 (<i>Notch1</i>)</p> <p>Notch gene homolog 3 (<i>Notch3</i>)</p> <p>Notch-regulated ankyrin repeat protein (<i>Nrarp</i>)</p> <p>Paired box gene 6 (<i>Pax6</i>)</p> <p>Protocadherin 8 (<i>Pcdh8</i>)</p> <p>Platelet derived growth factor, B polypeptide (<i>Pdgfb</i>)</p> <p>Platelet derived growth factor receptor, alpha polypeptide (<i>Pdgfra</i>)</p> <p>Pre T-cell antigen receptor alpha (<i>Ptcra</i>)</p> <p>Recombination signal binding protein for immunoglobulin kappa J region-like (<i>Rbpjl</i>)</p> <p>Ras homolog gene family, member V (<i>Rhov</i>)</p> <p>Runt related transcription factor 1 (<i>Runx1</i>)</p> <p>Sphingosine-1-phosphate receptor 3 (<i>Slpr3</i>)</p> <p>Snail homolog 1 (<i>Snail</i>)</p> <p>Suppressor of cytokine signaling</p> |  |
|--|-------------------------------------------------------------------------------------------------------------------------------------------------------------------------------------------------------------------------------------------------------------------------------------------------------------------------------------------------------------------------------------------------------------------------------------------------------------------------------------------------------------------------------------------------------------------------------------------------------------------------------------------------------------------------------------------------------------------------------------------------------------------------------------------------------------------------------------------------------------------------------------------------------------------------------------------------------------------------------------------------------------------------------------------------------------------------------------------------------------------------------------------------------------------------------------------------------------------------------------------------------------------------------------------------------------------------------------------------------|--|

|  |                                                                                                                                                                                                                                                                                                                                                              |  |
|--|--------------------------------------------------------------------------------------------------------------------------------------------------------------------------------------------------------------------------------------------------------------------------------------------------------------------------------------------------------------|--|
|  | 3 ( <i>Socs3</i> )<br>SRY-box containing gene 9<br>( <i>Sox9</i> )<br>Transcription factor 15 ( <i>Tcf15</i> )<br>Tec protein tyrosine kinase ( <i>Tec</i> )<br>WNT1 inducible signaling<br>pathway protein 1 ( <i>Wisp1</i> )<br>Wingless-related MMTV<br>integration site 4 ( <i>Wnt4</i> )<br>Wingless-related MMTV<br>integration site 6 ( <i>Wnt6</i> ) |  |
|--|--------------------------------------------------------------------------------------------------------------------------------------------------------------------------------------------------------------------------------------------------------------------------------------------------------------------------------------------------------------|--|

**Supplementary Table 1. Genes encoding Notch signaling targets showing altered expression in isolated smooth muscle cells from Akt1 $\Delta$ EC;Akt2KO mice.** Total RNA was isolated from smooth muscle cells using the Qiagen RNeasy kit and cDNA was synthesized using the Qiagen RT<sup>2</sup> First Strand kit. Real-time PCR was performed using Qiagen RT<sup>2</sup> Profiler PCR Array kit for Mouse Notch Signaling Targets and measured on a BioRad myIQ2 iCycler. Data was analyzed by the  $\Delta\Delta C_T$  method using the SABiosciences PCR Array Data analysis tools to calculate fold change increased expression or decreased expression in Akt1 $\Delta$ EC samples compared to WT.

SUPPLEMENTARY TABLE 2

| <b>Gene</b>    | <b>Forward primer sequence</b> | <b>Reverse primer sequence</b> |
|----------------|--------------------------------|--------------------------------|
| <i>mAkt1</i>   | gccccaacacctttatcatcc          | gtccatcgtctcttcttctctg         |
| <i>mAkt2</i>   | ccttccttacagccctcaagt          | tgacacaatctctgctccataa         |
| <i>mSma</i>    | atcagcaaacaggaatacagac         | aaaccacgagtaacaaatcaaa         |
| <i>mCd31</i>   | cacacacacacaaagtcaacc          | tagccagccatttcttcttctt         |
| <i>mCdh5</i>   | aaggggcatacagacacaaa           | gcttatcacacagcaaacct           |
| <i>mHes1</i>   | caaagcctatcatggagaagag         | ggaggtgcttcacagtcattt          |
| <i>mHey2</i>   | ctccacacatcagagtcaacc          | gccgaaagagacagaagagag          |
| <i>hHEY2</i>   | agcagtgcattggtataagca          | tggagagttttcaagttggca          |
| <i>mJag1</i>   | ccgccataggttagagtttga          | atttcccagccaaccaca             |
| <i>hJAG1</i>   | acaataggatgggcttctgtg          | atcacctgcctgtctcttttc          |
| <i>mDll4</i>   | aatcatcatccaaggctctct          | aaagacatataggctggtcaca         |
| <i>mNotch3</i> | aaccagaagttacccccaaag          | cacactacaagacagagaggtg         |
| <i>mVegf</i>   | ggaggcagagaaaagagaaaag         | acacacacacacacacacaca          |
| <i>mPdgfrβ</i> | gaccagttttctttccctttt          | ccccagagtgtgaagtgtatc          |
| <i>mp63</i>    | ctgctcaaaggcacacatc            | caacaggaggtaacagaaaagg         |
| <i>mStat3</i>  | taaagggcaaacacactgac           | gcatactgggtaacaaaacc           |
| <i>hSTAT3</i>  | tgtctccttgctgtctaaag           | acaagtgccactggatatac           |
| <i>18s</i>     | gcggttctatttgttggttt           | ctccgactttcgttcttgatt          |
| <i>mNotch1</i> | gcaggctccagtgttctgt            | agtccaggcagtggtttctct          |
| <i>mNotch4</i> | ggaaggaaggaagcgacac            | aggaaaatcacggtctatctca         |
| <i>mMyh11</i>  | cgacacagcctacagaagca           | tctttcttgcccttggtggga          |
| <i>mSm22a</i>  | gctgtgaccaaaaacgatg            | gccttccctttctaactgatg          |

Supplementary Table 2. Primer sequences for genes assayed by quantitative PCR.
